1 Unleashing meiotic crossovers in hybrid plants.

2 Joiselle Blanche Fernandes\*, Mathilde Seguéla-Arnaud\*, Cecile Larchevêque,  
3 Andrew H. Lloyd and Raphael Mercier#

4

5 Institut Jean-Pierre Bourgin, INRA, AgroParisTech, CNRS, Université Paris-Saclay,  
6 RD10, 78000 Versailles, France

7 \*Co-first authors

8 #Corresponding author: [raphael.mercier@inra.fr](mailto:raphael.mercier@inra.fr)

9

10 Meiotic crossovers shuffle parental genetic information, providing novel combinations  
11 of alleles on which natural or artificial selection can act. However, crossover events  
12 are relatively rare, typically one to three exchange points per chromosome pair.  
13 Recent work has identified three pathways limiting meiotic crossovers in *Arabidopsis*  
14 *thaliana*, that rely on the activity of FANCM<sup>1</sup>, RECQ4<sup>2</sup> and FIGL1<sup>3</sup>, respectively.  
15 Here, we analyzed recombination in plants where one, two or three of these  
16 pathways were disrupted, in both pure line and hybrid contexts. The highest effect  
17 was observed when combining *recq4* and *figl1* mutations, which increased the hybrid  
18 genetic map length from 389 to 3037 centiMorgans. This corresponds to an  
19 unprecedented 7.8-fold increase in crossover frequency. Disrupting the three  
20 pathways do not further increases recombination, suggesting that some upper limit  
21 has been reached. The increase in crossovers is not uniform along chromosomes  
22 and rises from centromere to telomere. Finally, while in wild type recombination is  
23 much higher in male than in female meiosis (490 cM vs 290 cM), female

24 recombination is higher than male in *recq4 figl1* (3200 cM vs 2720 cM), suggesting  
25 that the factors that make wild-type female meiosis less recombinogenic than male  
26 wild-type meiosis do not apply in the mutant context. The massive increase of  
27 recombination observed in *recq4 figl1* hybrids opens the possibility to manipulate  
28 recombination to enhance plant breeding efficiency.

29

30

31 Crossovers (COs) are reciprocal exchanges between homologous chromosomes,  
32 with two consequences: First, in combination with sister chromatid cohesion, COs  
33 provide a physical link between homologs, which is required for balanced segregation  
34 of chromosomes at meiosis. Failure in the formation of at least one crossover per  
35 chromosome pair is associated with reduced fertility and aneuploidy<sup>4</sup>. Second, COs  
36 lead to the exchange of flanking DNA, generating novel mosaics of the homologous  
37 chromatids. This translates into genetic recombination, classically measured in  
38 Morgans (or centiMorgans cM). The number of COs appears to be constrained by  
39 both an upper and lower limit (Figure 1)<sup>5</sup>. As an illustration, figure 1 plots the genetic  
40 size (cM) versus the physical size (DNA base pairs, log scale) of chromosomes in a  
41 diverse panel of eukaryotes. Note the large variations in physical size, while the  
42 genetic map length is much less variable: At the lower limit, chromosomes measure  
43 50 cM, which corresponds to the requirement of at least one CO per chromosome  
44 pair (0.5 per chromatid). Across all species, most chromosomes do not receive many  
45 more than one CO per meiosis, 80% of them having less than three. High level of  
46 COs per chromosome, observed in handful of species such as *S. pombe*, appears  
47 thus to be counter-selected in most species, suggesting that CO rate is a trait under  
48 selection in both directions<sup>6</sup>.

49 Plant breeding programs rely on meiotic COs that allow the stacking of desired traits  
50 into elite lines. However, as described above, the number of COs is low. Further,  
51 some regions are virtually devoid of COs, such as the regions flanking centromeres<sup>7</sup>.  
52 This limits the genetic diversity that can be created in breeding programs and in  
53 addition, limits the power of genetic mapping in pre-breeding research. Increasing  
54 recombination is thus a desired trait in plant breeding<sup>8,9</sup>. Forward screen approaches  
55 have identified three pathways that limit recombination in *Arabidopsis thaliana*, relying

56 respectively on the activity of (i) FANCM helicase and its cofactors<sup>1,10</sup>, (ii) the  
57 BLM/Sgs1 helicase homologues RECQ4A and RECQ4B and the associated proteins  
58 TOP3 $\alpha$  and RMI1<sup>2,11</sup>; (iii) the FIGL1 AAA-ATPase<sup>3</sup>. *RECQ4A* and *RECQ4B* are  
59 duplicated genes that redundantly limit meiotic crossovers in *Arabidopsis*, and will be  
60 herein designated as RECQ4, for simplicity. In all mutants, recombination is largely  
61 increased compared to wild type, when tested in pure lines. However, the *fancm*  
62 mutation, which increases meiotic recombination three fold in pure lines, has almost  
63 no effect on recombination in hybrids<sup>3,12</sup>. It thus remained unclear if the manipulation  
64 of these three pathways could be used to increase recombination in hybrids, the  
65 context that matters for plant breeding programs.

## 66 Results

67 Here we analyzed recombination in single, double and triple mutants for *FANCM*,  
68 *RECQ4* and *FIGL1*, in both pure line and hybrid contexts, using two complementary  
69 approaches. First, we used a Fluorescent Tagged Line (FTL I2ab) that relies on  
70 transgenic markers conferring fluorescence to pollen grains organized in tetrads<sup>13</sup>  
71 (Figure 2). With this tool we accurately measured recombination in two adjacent  
72 intervals in either pure line (Col) or F1 hybrid contexts (Col/Ler). Second, we used the  
73 segregation in F2 progeny of a set of 96 Col/Ler SNPs<sup>3</sup> to measure recombination  
74 genome-wide in F1 hybrid contexts (Figure 3). In pure Col, each single mutant has  
75 higher recombination than wild type in both FTL tested intervals (Figure 2A-B). Each  
76 double-mutant is higher than the respective single mutants, confirming that *FANCM*,  
77 *RECQ4* and *FIGL1* act in three different pathways to limit COs. The highest increase  
78 is observed in the *fancm recq4* and *figl1 recq4* double mutants both with a ~10-fold  
79 increase compared to wild type. The observation that each double mutant  
80 combination results in an increase in recombination compared to the single mutants

81 (i.e. three independent pathways), predicts that the triple mutant should even further  
82 increase recombination. However, recombination in the *figl1 recq4 fancm* triple  
83 mutant is not higher than in the highest doubles, suggesting that some upper limit  
84 has been reached. In the Col/Ler hybrid context (figure 2C-D for FTLs ; Figure 3A for  
85 genome wide genetic map), both *figl1* and *recq4* increased recombination, but *fancm*  
86 had no detectable effect as previously described in several hybrid contexts<sup>3,12</sup>.  
87 Similar to observations in pure Col, double-mutant hybrids have higher recombination  
88 than the corresponding singles. Notably, the *fancm* mutation leads to a detectable  
89 increase in recombination when combined with *figl1* or *recq4* (Figure 2C-D, Figure  
90 3A). This predicts again that combining the three mutations should lead to a further  
91 increase. However, recombination is not statistically higher in the *figl1 recq4 fancm*  
92 triple-mutant compared to the *figl1 recq4* double and appears to be even reduced  
93 (Figure 2C and 3A).

94 The highest increase in the hybrid context is thus observed in the *figl1 recq4* double  
95 mutant, with a ~11-fold increase in the FTL I2ab intervals (Figure 2 C-D) and 7.8-fold  
96 increase genome wide (Figure 3A), from  $389 \pm 18$  cM in wild type to  $3037 \pm 115$  cM  
97 in *figl1 recq4* (which translates into  $7.8 \pm 0.4$  and  $60.7 \pm 2.3$  COs per meiosis,  
98 respectively). This is much higher than the highest increase in meiotic recombination  
99 observed so far in any mutant<sup>14-16</sup>. While *Arabidopsis* wild type has a very typical  
100 frequency of CO, with the genetic maps of each of the five chromosomes ranging  
101 from 70 to 110 cM (on average 1.6 CO per chromosome), the *figl1 recq4* is almost  
102 the highest recombining eukaryote (Figure 1) with the genetic maps of chromosomes  
103 ranging from 450 to 800 cM (on average 12 COs per chromosome: Figure 1).

104 We addressed if such a large increase in recombination could reduce the fertility of  
105 plants, precluding use of these mutant combinations in breeding programs. In

106 hybrids, the number of seeds per fruit was not significantly reduced in any genotype  
107 (Figure 4B). However, a slight defect in pollen viability was observed in single and  
108 multi-mutants (Figure 4D). Further, in pure Col, both reduced seed set and pollen  
109 viability defects were detected, and were highest in *recq4 figl1* and *recq4 figl1 fancm*  
110 (Figure 4A, 4C). This suggests that some fertility defects may be associated with  
111 increased recombination. However, the fertility defects in the different genotypes are  
112 quite poorly correlated with the increases in COs (Compare Figure 2 and 4). For  
113 example, Col *fancm recq4* has the same large increase in recombination observed in  
114 *figl1 recq4* (Figure 2A-B), but pollen viability is much less affected (Figure 4C). This  
115 suggests that high levels of COs are not responsible *per se* for reduced fertility. We  
116 further examined meiosis in the Col *recq4 figl1* and *recq4 figl1 fancm* which show  
117 >40% pollen death (Figure 5). At diakinesis, homologous chromosomes are  
118 associated in pairs, connected by COs. The chromosomes appear more tightly  
119 connected in the mutants than in wild type, presumably because of increased CO  
120 numbers (Figure 5A-B). The shape of chromosomes at metaphase I, is also  
121 suggestive of increased CO numbers (Figure 5 C-D). At metaphase II, chromosome  
122 spreads revealed the presence of a few chromosome fragments and chromosome  
123 bridges in 50% of the cells (n=115 metaphase II cells; Figure 5 E-G), suggesting  
124 defective repair of a small subset of recombination intermediates. We propose that  
125 the absence of *FIGL1* and *RECQ4* disturbs the DSB repair machinery, leading to the  
126 formation of aberrant intermediates (such as the multi-chromatid joint molecules  
127 observed in the yeast *recq4* homologue *sgs1*<sup>17</sup>), most of them being repaired as  
128 extra-COs and a few failing to be repaired. We suggest that those unrepaired  
129 intermediates are responsible for most of the reduced fertility, but we cannot fully  
130 exclude that the extra COs themselves slightly disturb chromosome segregation.

131 Next, we explored the distribution of COs along the genome (Figure 3 B-C) using the  
132 Col/Ler genome-wide recombination data. The first line of figure 3B-C shows gene  
133 density, single nucleotide polymorphism density<sup>28</sup> and proportion of methylated  
134 cytosines<sup>30</sup> plotted along each of chromosomes. The centromeres (vertical dotted  
135 line in figure 3B) are flanked by peri-centromeric regions having low gene density and  
136 high methylated cytosines (>7.5%, the genome average. Delimited by thin dotted  
137 lines). The three bottom lines of figure 3B-C show recombination along the  
138 chromosomes in single, double and triple mutants, respectively. At the scale used in  
139 this study (bins of ~1.3 Mb), the wild type curve of recombination frequency oscillates  
140 around ~2.5-3.5 cM/Mb in chromosome arms, with the maximums observed close to  
141 peri-centromeric and telomeric regions. The interval that spans the centromere in  
142 each chromosome, have very low levels of recombination. In accordance with results  
143 for total map size (figure 3A), *fancm* is indistinguishable from wild type. The curves of  
144 all the other mutant genotypes show higher recombination than wild type with *recq4*  
145 *figl1* having the strongest effect (Figure 3 B-C). In all mutants, the same tendency is  
146 observed, with no effect on recombination for intervals encompassing or immediately  
147 flanking the centromere and an increase of the recombination with distance from the  
148 centromere to reach a maximum close to telomeres. In *figl1 recq4*, the recombination  
149 frequency rises rapidly from the centromere to the first third of the arm, where it  
150 reaches ~20 cM/Mb (~5-fold higher than wild type levels). This first third of the  
151 chromosome arms correspond to the peri-centromeric region, with a progressive  
152 decrease in methylation and increase in gene density with distance from centromere  
153 (Figure 3B-C, first row). In the remaining two third of the chromosomes, methylation  
154 and gene density is relatively stable, but recombination continues to increase towards  
155 the telomere, reaching an average of 45 cM/Mb (>10-fold higher than wild type

156 levels). Knocking down *recq4* and *figl1* therefore has very different effects in different  
157 regions of the chromosome. We propose three non-exclusive possible causes for this  
158 effect. First, the position along the chromosome itself could influence CO  
159 frequencies, as recombination occurs in the context of highly organized and dynamic  
160 chromosomes<sup>18</sup>. Second, the accessibility of the chromatin may directly account for  
161 CO frequency, notably by influencing SPO11-dependant double strand break  
162 formation<sup>19</sup>. The anti-correlation of cytosine methylation and recombination (Figure  
163 3D) seen in *recq4 figl1*, supports this view. Third, DNA polymorphism, which  
164 decreases from centromere to telomere (Figure 3C) may also prevent CO frequency.  
165 We observed a strong anti-correlation between recombination and SNP density in  
166 *recq4 figl1*, which does not exist in wild type (Figure 3E). As distance from  
167 centromere, methylation and polymorphisms are correlated with each other, it is  
168 difficult to decipher the relative importance of these three parameters for  
169 recombination in *recq4 figl1*. Interestingly, a drop in recombination is observed in the  
170 middle of the right arm of chromosome 1 in *recq4 figl1* and *recq4 figl1 fancm* (figure  
171 3B), corresponding to a region of high polymorphism associated with a cluster of  
172 NBS-LRR disease resistance genes<sup>20</sup>. This supports the hypothesis that DNA  
173 polymorphisms discourage extra COs in the mutants. In some crops such as wheat<sup>21</sup>,  
174 barley<sup>22</sup> or tomato<sup>23</sup>, large portions of chromosomes surrounding centromeres  
175 receive virtually no COs, albeit containing genes that are thus out of reach for  
176 breeding. It would be of particular interest to test the effect of *recq4 figl1* in such  
177 crops to see how the CO increase we see in the short peri-centromeres of  
178 Arabidopsis translates to their large peri-centromeres.

179 Next, we addressed whether the increase in recombination that we observed in F2s,  
180 equally affects male and female meiosis, by backcrossing the F1 hybrids (wild type,



181 *recq4* or *recq4 figl1*) by Col-0, either as male or as female and analyzing SNP  
182 segregation in the progeny (Figure 6). In wild type the male genetic map was ~70%  
183 larger than in female ( $495 \pm 38$  cM vs  $295 \pm 28$  cM,  $p < 10^{-4}$ ), the difference being  
184 particularly marked in the vicinity of telomeres where male recombination is at its  
185 highest and female at its lowest (Figure 6B-C), in accordance with previous data<sup>24</sup>. In  
186 sharp contrast, in *recq4* and *recq4 figl1* the female maps are larger than the male  
187 maps ( $p < 10^{-4}$ ; Figure 6A) and the CO distributions becomes similar in both sexes  
188 (Figure 6B-C). The total female map is increased from  $295 \pm 28$  cM in wild type to  
189  $3176 \pm 190$  cM in *recq4 figl1*, a more than 10-fold increase. The most spectacular  
190 increase being observed at the vicinity of telomeres where the recombination rate is  
191 on average 0.8 cM/Mb in female wild type and 47 cM/Mb in female *recq4 figl1*. In wild  
192 type, the vast majority of COs are of class I while *recq4* and *figl1* mutations increase  
193 class II COs<sup>2,3,5</sup>. Accordingly, the effects of CO interference, which limits the  
194 occurrence of two adjacent class I COs, are observed genetically in wild type but not  
195 in the mutants with increased recombination (Table S1 and Figure 6D). It appears,  
196 therefore, that regulation of class I COs shapes their distribution along chromosomes  
197 and differentiates male and female meiosis, but this regulation does not apply to the  
198 class II COs up-regulated in the *recq4 figl1* double mutant.

199 We showed that a large CO frequency is obtained when combining *recq4* and *figl1*  
200 mutations, resulting in a 7.8-fold increase in total map size, with limited effect on plant  
201 fertility. This opens the possibility to manipulate recombination in plant breeding  
202 programs, to increase shuffling of genetic information, break undesirable linkage,  
203 combine desirable traits, or increase the power of genetic mapping in pre-breeding  
204 research. It is intriguing that very few eukaryotes have high CO levels per  
205 chromosome while it is possible, as shown here and by a few exceptional

206 eukaryotes. One possibility is that a high level of COs is associated with segregation  
207 problems at meiosis and thus fertility defects. Our data could support this possibility.  
208 Alternatively, it is possible that selection for a low level of recombination limits COs in  
209 eukaryotes, which could be optimal for adaptation in most contexts. An attractive idea  
210 is that in a stable environment, high recombination levels would break favorable  
211 allelic combinations that have been selected in previous generations<sup>25</sup>. The ZMM  
212 pathway that accounts for most COs in plants, mammals and fungi may have thus  
213 arisen in early eukaryotes to address the opposing constraints of ensuring at least  
214 one CO per chromosome while being able to adjust their numbers to low levels.

215

216 Methods:

217 The mutations used in this study were: Col: *fancm-1*<sup>1</sup>, *figl1-1*<sup>3</sup>, *recq4a-4* (N419423)<sup>26</sup>, *recq4b-*  
218 *2* (N511130)<sup>26</sup>; Ler: *fancm-10*<sup>3</sup>, *figl1-12*<sup>3</sup>, *recq4a-W387*<sup>2</sup>. The tetrad analysis line was I2ab  
219 (FTL1506/FTL1524/FTL965/*qrt1-2*)<sup>13</sup>. Hybrid lines were obtained through the crossing of Col  
220 plants bearing the *fancm*, *recq4a*, *recq4b*, *figl1*, *qrt* mutations and the FTL transgenes I2ab to  
221 Ler plants bearing the *fancm*, *recq4a*, *figl1* and *qrt* mutations. F1 plants were grown in growth  
222 chambers (16h/day 21°C, 8h/night 18°C, 65% humidity) and genotyped twice for each  
223 mutation (Table S5). F1 sibling plants of the desired genotypes were used for tetrad analysis,  
224 fertility measures, selfed to produce the F2 population and crossed as male or female to Col-  
225 0 to produce BC1 populations. Tetrad analysis (Figure 2), including data collection,  
226 measures of recombination (Perkins equation) and interference (Interference ratio) and  
227 statistical tests were performed as described in Girard *et al.*<sup>8</sup>. F2 and BC1 populations were  
228 grown for three weeks and 100-150 mg leaf material was collected from rosettes. DNA  
229 extraction and genotyping for Col/Ler polymorphisms was performed using the KASPAR  
230 technology at Plateforme Gentyane, INRA Clermont-Ferrand, France. The set of 96 KASPAR  
231 markers (Table S4), which are uniformly distributed on the physical map (~every 1,3Mb)  
232 has been described in Girard *et al.*<sup>8</sup>. Genotyping data were analyzed with the Fluidigm  
233 software (<http://www.fluidigm.com>) with manual corrections. The raw genotyping data set is  
234 shown in table S3. Recombination data were analysed with MapDisto 1.7.7.0.1.1<sup>27</sup>.  
235 Genotyping errors were filtered using the iterative error removal function (iterations=6, start  
236 threshold=0,001, Increase=0,001). Recombination (cM+/- SEM) was calculated using  
237 Classical fraction estimate and the Haldane mapping function. The Haldane function has  
238 been preferred to the Kosambi function because the Kosambi function incorporates  
239 crossover interference, the effect of which is absent in the mutants analyzed in this study  
240 (Figure 6D and table S2, and would have thus likely underestimated the genetic distances.  
241 The obtained recombination frequencies per interval and corresponding genomic data are  
242 shown in Table S4. Crossover interference patterns (Figure 6D) were analysed using

243 MADpatterns<sup>28</sup>. Graphical representations were prepared with Graph Prism 6. Tests shown  
244 on figure 3A are one way Anova with Dunnet correction on the observed number of COs  
245 (Genotype transitions) per F2 plant in the genotyping data after error filtering. Male meiotic  
246 chromosome spreads have been performed as described previously<sup>29</sup>.

247

## 248 Acknowledgments

249 We thank Ian Henderson for discussions and sharing data before publication. We are  
250 grateful to Christine Mézard, Mathilde Grelon and Eric Jenczewski for fruitful discussions and  
251 critical reading of the manuscript. We thank Gregory Copenhaver for providing the FTL lines.  
252 This work was funded by the European Research Council Grant ERC 2011 StG 281659  
253 (MeioSight) and the Fondation Simone et Cino del DUCA/Institut de France. AHL was  
254 supported by the International Outgoing Fellowships PIOF-GA-2013-628128, POLYMEIO.

255

## 256 Competing financial interests

257 Patents were deposited by INRA on the use of *RECQ4*, *FIGL1* and *FANCM* to manipulate  
258 meiotic recombination (EP3149027, EP3016506, EP2755995).

259

260

## 261 References

- 262 1. Crismani, W. *et al.* FANCM Limits Meiotic Crossovers. *Science*. **336**, 1588–  
263 1590 (2012).
- 264 2. Séguéla-Arnaud, M. *et al.* Multiple mechanisms limit meiotic crossovers:  
265 TOP3 $\alpha$  and two BLM homologs antagonize crossovers in parallel to FANCM.

- 266 *Proc. Natl. Acad. Sci. U. S. A.* **112**, 4713–4718 (2015).
- 267 3. Girard, C. *et al.* AAA-ATPase FIDGETIN-LIKE 1 and Helicase FANCM  
268 Antagonize Meiotic Crossovers by Distinct Mechanisms. *PLoS Genet.* **11**,  
269 e1005369 (2015).
- 270 4. Hunter, N. Meiotic Recombination: The Essence of Heredity. *Cold Spring Harb.*  
271 *Perspect. Biol.* **7**, 1–35 (2015).
- 272 5. Mercier, R., Mezard, C., Jenczewski, E., Macaisne, N. & Grelon, M. The  
273 molecular biology of meiosis in plants. *Annu. Rev. Plant Biol.* **66**, 297–327  
274 (2015).
- 275 6. Ritz, K. R., Noor, M. A. F. & Singh, N. D. Variation in Recombination Rate:  
276 Adaptive or Not? *Trends Genet.* **33**, 364–374 (2017).
- 277 7. Nambiar, M. & Smith, G. R. Repression of harmful meiotic recombination in  
278 centromeric regions. *Semin. Cell Dev. Biol.* **54**, 188–197 (2016).
- 279 8. Crismani, W., Girard, C. & Mercier, R. Tinkering with meiosis. *J. Exp. Bot.* **64**,  
280 55–65 (2013).
- 281 9. Wijnker, E. & de Jong, H. Managing meiotic recombination in plant breeding.  
282 *Trends Plant Sci.* **13**, 640–6 (2008).
- 283 10. Girard, C. *et al.* FANCM-associated proteins MHF1 and MHF2, but not the  
284 other Fanconi anemia factors, limit meiotic crossovers. *Nucleic Acids Res.* **42**,  
285 9087–9095 (2014).
- 286 11. Séguéla-Arnaud, M. *et al.* RMI1 and TOP3 $\alpha$  limit meiotic CO formation through  
287 their C-terminal domains. *Nucleic Acids Res.* **45**, 1860–1871 (2017).

- 288 12. Ziolkowski, P. A. *et al.* Juxtaposition of heterozygosity and homozygosity during  
289 meiosis causes reciprocal crossover remodeling via interference. *Elife* **2015**, 1–  
290 29 (2015).
- 291 13. Berchowitz, L. E. & Copenhaver, G. P. Fluorescent Arabidopsis tetrads: a  
292 visual assay for quickly developing large crossover and crossover interference  
293 data sets. *Nat. Protoc.* **3**, 41–50 (2008).
- 294 14. Ziolkowski, P. A. *et al.* Natural variation and dosage of the HEI10 meiotic E3  
295 ligase control Arabidopsis crossover recombination. *Genes Dev.* 1–12 (2017).  
296 doi:10.1101/gad.295501.116
- 297 15. Wang, K., Wang, C., Liu, Q., Liu, W. & Fu, Y. Increasing the Genetic  
298 Recombination Frequency by Partial Loss of Function of the Synaptonemal  
299 Complex in Rice. *Mol. Plant* (2015). doi:10.1016/j.molp.2015.04.011
- 300 16. Youds, J. L. *et al.* RTEL-1 enforces meiotic crossover interference and  
301 homeostasis. *Science (80-. )*. **327**, 1254–8 (2010).
- 302 17. Oh, S. D., Lao, J. P., Taylor, A. F., Smith, G. R. & Hunter, N. RecQ Helicase,  
303 Sgs1, and XPF Family Endonuclease, Mus81-Mms4, Resolve Aberrant Joint  
304 Molecules during Meiotic Recombination. *Mol. Cell* **31**, 324–336 (2008).
- 305 18. Zickler, D. & Kleckner, N. E. The leptotene-zygotene transition of meiosis.  
306 *Annu. Rev. Genet.* **32**, 619–97 (1998).
- 307 19. de Massy, B. Initiation of meiotic recombination: how and where? Conservation  
308 and specificities among eukaryotes. *Annu. Rev. Genet.* **47**, 563–99 (2013).
- 309 20. Choi, K. *et al.* Recombination Rate Heterogeneity within Arabidopsis Disease

- 310 Resistance Genes. *PLoS Genet.* **12**, e1006179 (2016).
- 311 21. Choulet, F. *et al.* Structural and functional partitioning of bread wheat  
312 chromosome 3B. *Science* **345**, 1249721 (2014).
- 313 22. Mascher, M. *et al.* A chromosome conformation capture ordered sequence of  
314 the barley genome. *Nat. Publ. Gr.* **544**, 1–43 (2017).
- 315 23. Sim, S.-C. *et al.* Development of a large SNP genotyping array and generation  
316 of high-density genetic maps in tomato. *PLoS One* **7**, e40563 (2012).
- 317 24. Giraut, L. *et al.* Genome-wide crossover distribution in *Arabidopsis thaliana*  
318 meiosis reveals sex-specific patterns along chromosomes. *PLoS Genet.* **7**,  
319 e1002354 (2011).
- 320 25. Otto, S. P. The evolutionary enigma of sex. *Am. Nat.* **174 Suppl**, S1–S14  
321 (2009).
- 322 26. Hartung, F., Suer, S. & Puchta, H. Two closely related RecQ helicases have  
323 antagonistic roles in homologous recombination and DNA repair in *Arabidopsis*  
324 *thaliana*. *Proc. Natl. Acad. Sci. U. S. A.* **104**, 18836–41 (2007).
- 325 27. Lorieux, M. MapDisto: fast and efficient computation of genetic linkage maps.  
326 *Mol. Breed.* **30**, 1231–1235 (2012).
- 327 28. White, M. A., Wang, S., Zhang, L. & Kleckner, N. Quantitative Modeling and  
328 Automated Analysis of Meiotic Recombination. *Methods Mol. Biol.* **1471**, 305–  
329 323 (2017).
- 330 29. Ross, K. J., Fransz, P. & Jones, G. H. A light microscopic atlas of meiosis in  
331 *Arabidopsis thaliana*. *Chromosom. Res.* **4**, 507–16 (1996).

332 30. Stroud, H., Greenberg, M. V. C., Feng, S., Bernatavichute, Y. V & Jacobsen, S.  
333 E. Comprehensive analysis of silencing mutants reveals complex regulation of  
334 the Arabidopsis methylome. *Cell* **152**, 352–64 (2013).

335 31. Wang, S., Zickler, D., Kleckner, N. E. & Zhang, L. Meiotic crossover patterns:  
336 Obligatory crossover, interference and homeostasis in a single process. *Cell*  
337 *Cycle* **14**, 305–314 (2015).

338

339



340 Figure 1. The number of meiotic crossovers is constrained in eukaryotes.

341 Chromosomes from a range of species are plotted according to their physical (X axis,  
342 Mb, log scale) and genetic size (Y axis, cM, linear scale). Physical size is based on  
343 genome sequence assembly and genetic size is based on F2 or male/female  
344 average. Sex chromosomes have been excluded. An earlier version of this figure,  
345 with fewer species represented, was published in Mercier et al<sup>5</sup>.

346

347 Figure 2. Meiotic recombination measured by FTL tetrad analysis.

348 (A, B) recombination in a pure Col-0 line, in intervals I2a and I2b, respectively. (C, D)  
349 Recombination in the Col/Ler F1 hybrids, in intervals I2a and I2b, respectively. Bars  
350 are genetic distance calculated with the Perkins equation in cM/Mb, +/- 95%  
351 confidence interval. Z-tests are indicated: \*\*\*:p<0,001; \*\*:p<0,01; \*p<0.05; ns: p>0,05  
352 Raw data can be found in table S1.

353 Figure 3. Genome wide recombination measured by SNPs segregation in F2s.

354 (A) Total genetic maps. Tests are one-way-anova on the observed number of COs  
355 per F2 plant, with Dunnet correction. (B) Plotted along each of chromosomes (Mb),  
356 (from top to bottom) is gene density, single nucleotide polymorphism (SNP) density<sup>28</sup>,  
357 proportion of methylated cytosines<sup>30</sup> and recombination in the different genotypes  
358 (cM/Mb, Haldane equation). Vertical dotted lines mark the position of the  
359 centromeres and peri-centromeres. (C) The same data merged for all chromosome  
360 arms (short arms of chromosome 2 and 4 have been excluded), plotted along relative  
361 distance form centromere, and smoothed. (D) Each interval is plotted according to  
362 the proportion of methylated cytosines and recombination frequency. (E) Each

363 interval is plotted according to SNP density and recombination frequency. Linear  
364 regressions and associated R squares are shown.

365 Figure 4. Analysis of fertility.

366 (A, B) Number of seeds per fruit in pure Col and Col/Ler F1 hybrids, respectively. (C,  
367 D) Average number of viable and non-viable pollen grains per anther, following  
368 alexander staining. n indicates for the number of plants analyzed. For each plant, the  
369 number of seeds has been counted in a minimum of 10 fruits, and the number of  
370 pollen grains in a minimum of three anthers. Errors bars : +/- SD. Tests compare  
371 each genotype with the wild type, and are done by Anova followed by Dunnet  
372 correction for multiple tests.

373

374 Figure 5. Meiotic chromosome spreads.

375 (A, B) Diakinesis. Five chromosome pairs are observed in both wild type (Col) and  
376 *recq4 figl1* and appear to be more tightly linked in *recq4 figl1*. (C,D) Metaphase I. The  
377 five chromosome pairs are aligned on the metaphase plate. (E-H) Metaphase II. In  
378 wild type, five pairs of chromatids align on two metaphase plates. In *recq4 figl1* and  
379 *recq4 figl1 fancm*, chromatid bridges (large arrows) and chromosome fragments  
380 (small arrows) are observed in 50% of the cells. Scale bars=10µM.

381 Figure 6. Male and female genome wide recombination

382 (A) Total male (blue) and female (pink) genetic maps in the wild type, *recq4* and  
383 *recq4 figl1*. (B) Plotted along each of the five chromosomes (Mb), is male and female  
384 recombination in the different genotypes (cM/Mb, Haldane equation). Errors bars  
385 represent 95% confidence intervals. Vertical dotted lines mark the position of the

386 centromeres. (C) The same data as in B, merged for all chromosome arms (short  
387 arms of chromosome 2 and 4 have been excluded), plotted along relative distance  
388 from centromere and smoothed. (D) CoC curves. Coefficient of Coincidence is the  
389 ratio of the frequency of observed double COs to the frequency of expected double  
390 COs (the product of the CO frequencies in each of the two intervals). A CoC curve<sup>31</sup>  
391 plots this ratio for each pair of intervals, as a function of inter-interval distance. In the  
392 presence of CO interference, CoC is around 0 for small inter-intervals distances,  
393 increasing to 1 with fluctuation around that value for larger inter-interval distances, as  
394 seen here for wild type. A flat line at 1, as observed for the mutants, suggests an  
395 absence of interference.

396

397 Table S1. References for data in Figure 1.

398 Table S2. Raw data of FTL tetrad analysis

399 Table S3. Raw genotyping data

400 Table S4. Genomic and recombination data

401 Table S5. Genotyping primers

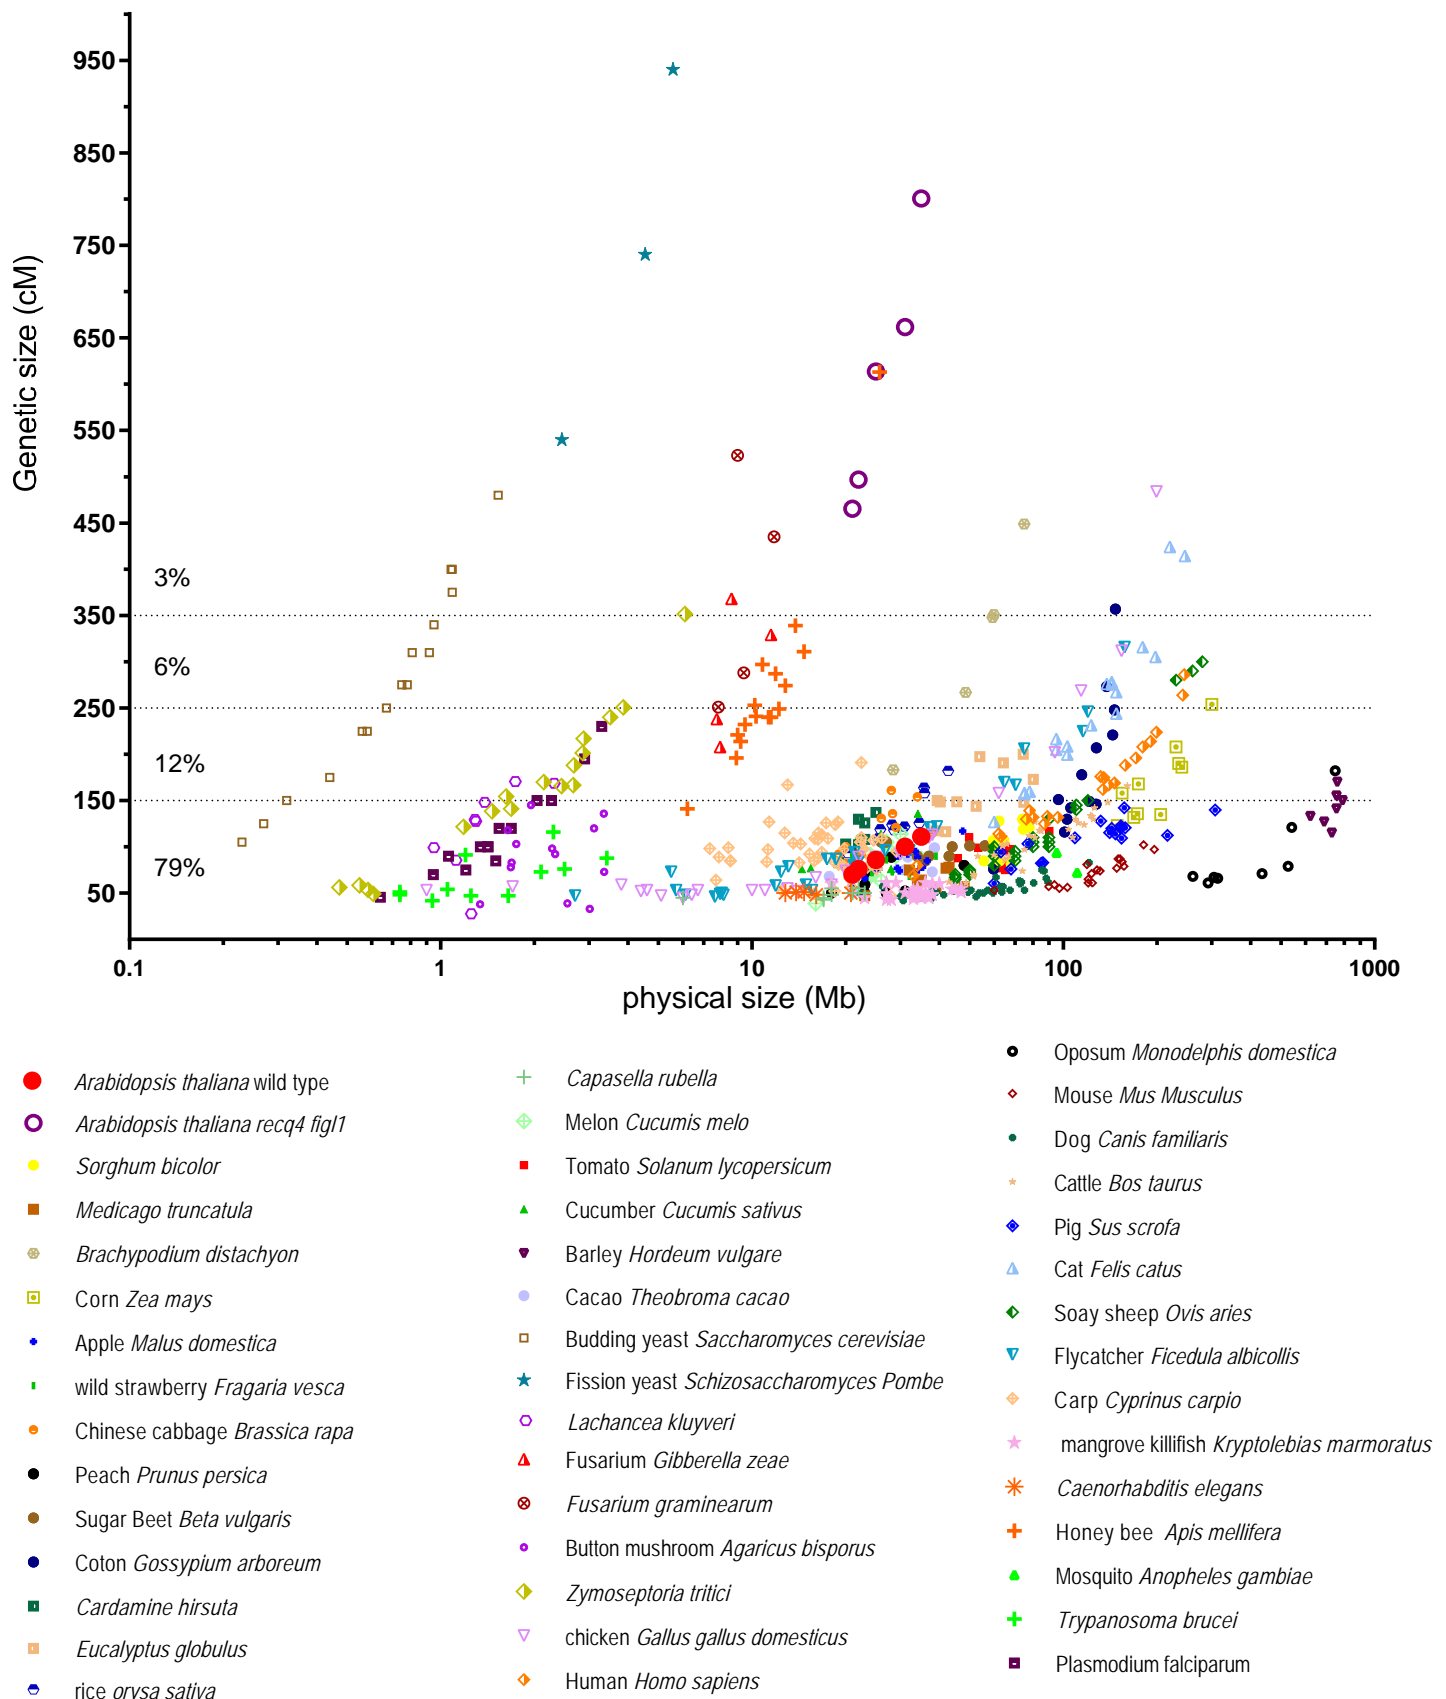

Figure 1. The number of meiotic crossovers is constrained in eukaryotes.

Chromosomes from a range of species are plotted according to their physical (X axis, Mb, log scale) and genetic size (Y axis, cM, linear scale). Physical size is based on genome sequence assembly and genetic size is based on F2 or male/female average. Sex chromosomes have been excluded. An earlier version of this figure, with fewer species represented, was published in Mercier et al <sup>5</sup>.

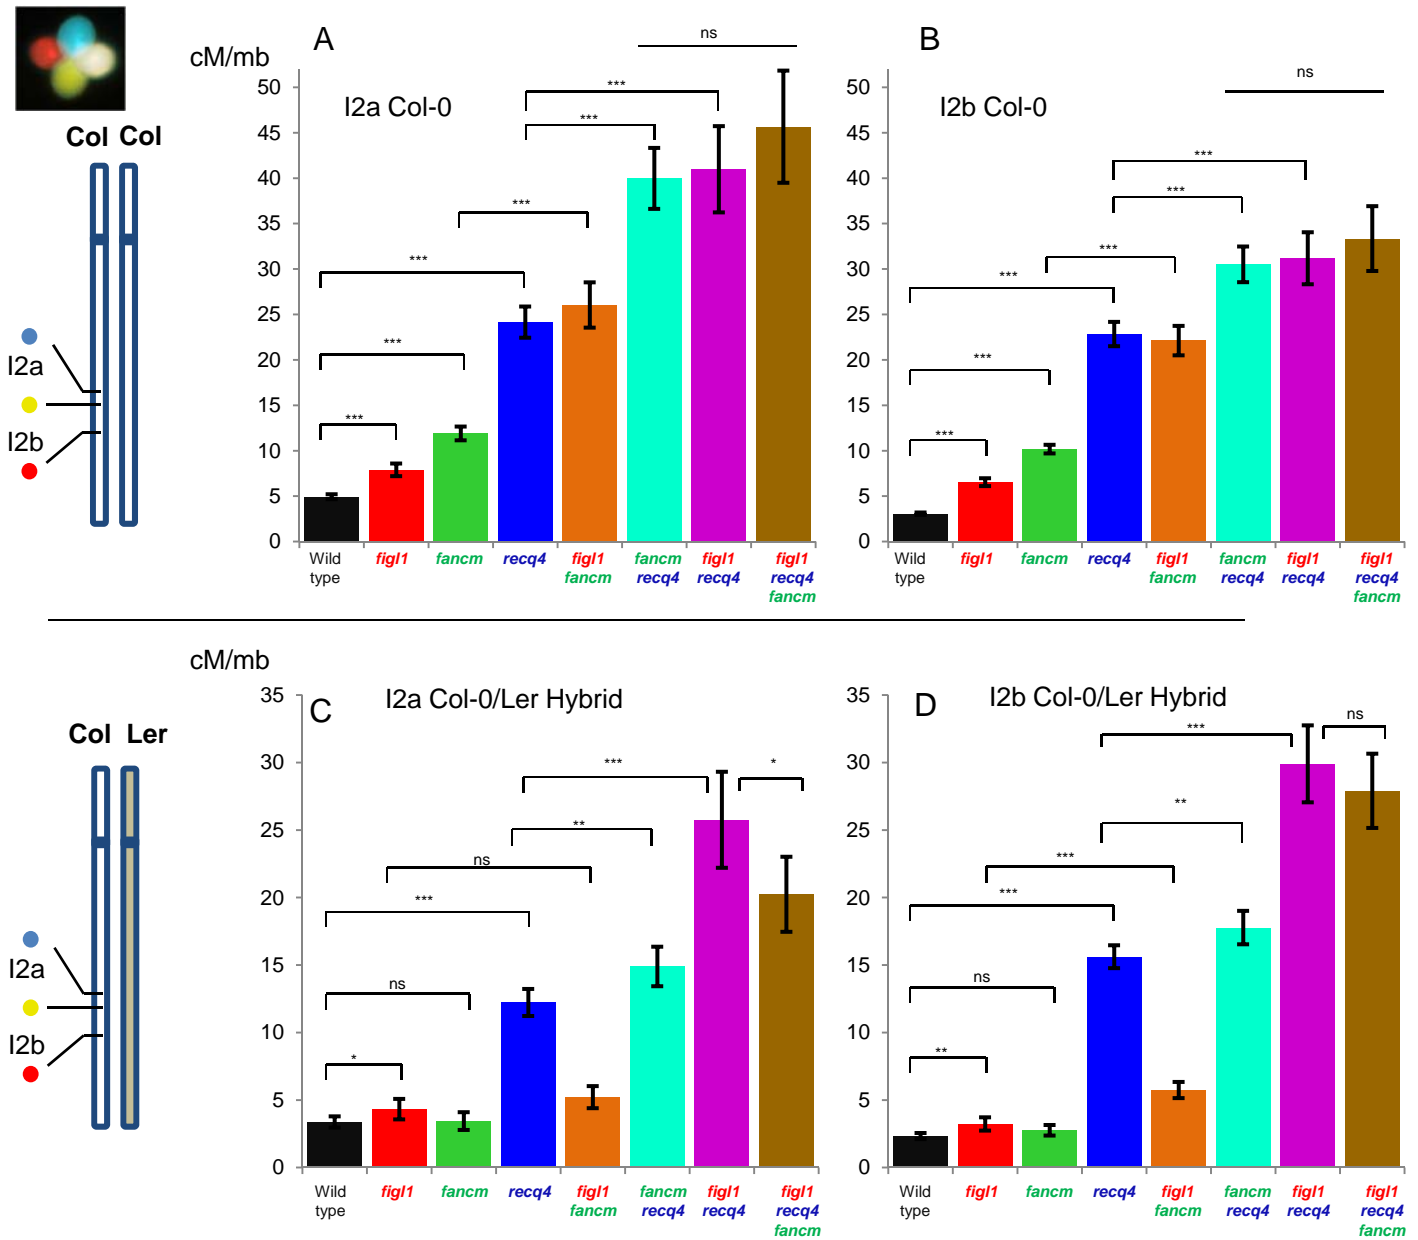

Figure 2. Meiotic recombination measured by FTL tetrad analysis.

(A, B) recombination in a pure Col-0 line, in intervals I2a and I2b, respectively. (C, D) Recombination in the Col/Ler F1 hybrids, in intervals I2a and I2b, respectively. Bars are genetic distance calculated with the Perkins equation in cM/Mb, +/- 95% confidence interval. Z-tests are indicated: \*\*\*:  $p < 0,001$ ; \*\*:  $p < 0,01$ ; \*:  $p < 0,05$ ; ns:  $p > 0,05$ . Raw data can be found in table S1.

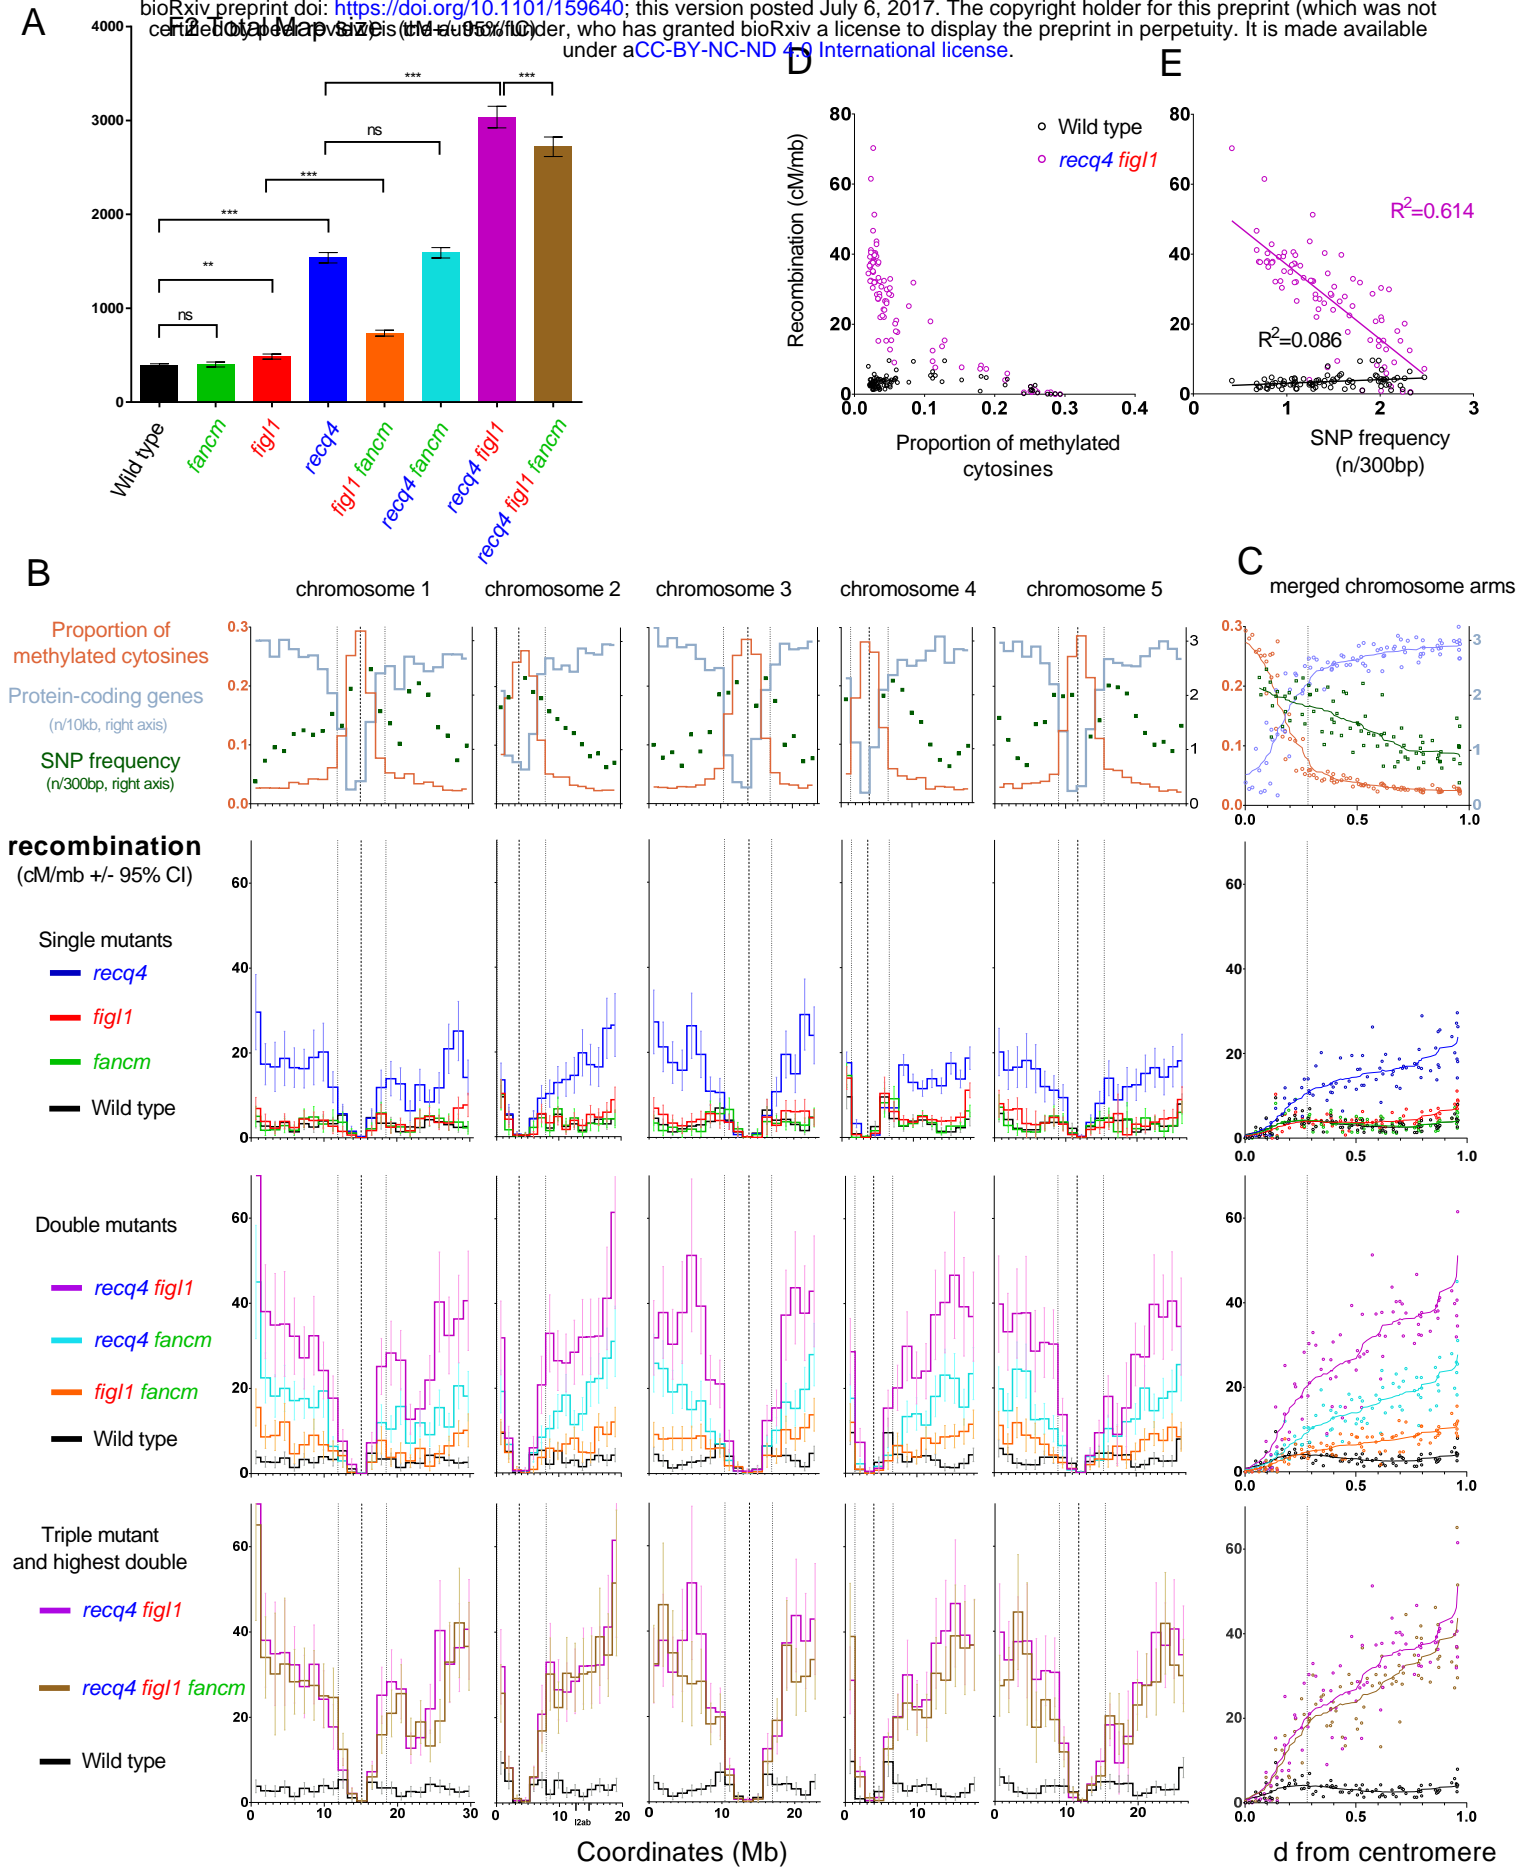

Figure 3. Genome wide recombination measured by SNPs segregation in F2s.

(A) Total genetic maps. Tests are one-way-anova on the observed number of COs per F2 plant, with Dunnett correction. (B) Plotted along each of chromosomes (Mb), (from top to bottom) is gene density, single nucleotide polymorphism (SNP) density, proportion of methylated cytosines and recombination in the different genotypes (cM/Mb, Haldane equation). Vertical dotted lines mark the position of the centromeres and peri-centromeres. (C) The same data merged for all chromosome arms (short arms of chromosome 2 and 4 have been excluded), plotted along relative distance from centromere, and smoothed. (D) Each interval is plotted according to the proportion of methylated cytosines and recombination frequency. (E) Each interval is plotted according to SNP density and recombination frequency. Linear regressions and associated R squares are shown.

A

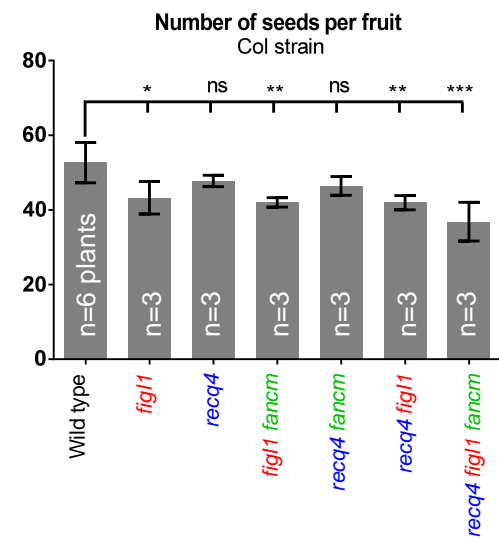

B

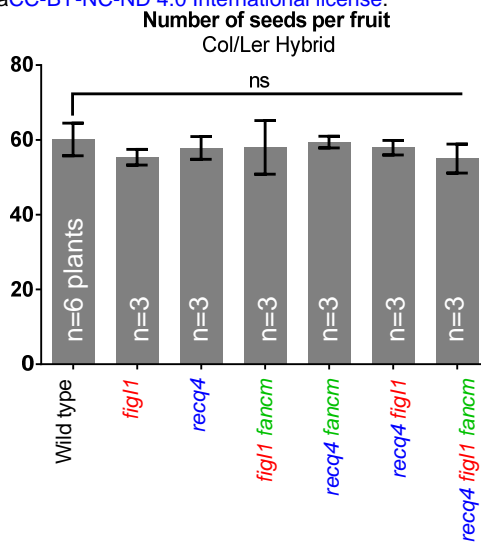

C

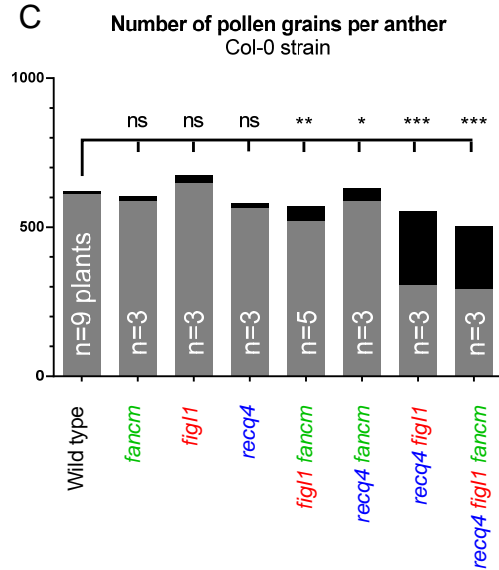

D

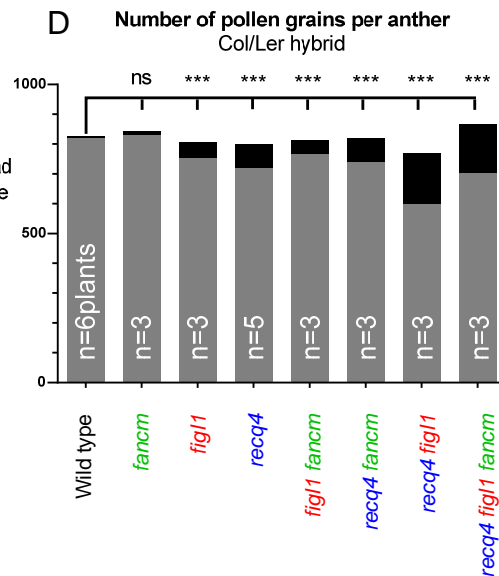

Figure 4. Analysis of fertility.

(A, B) Number of seeds per fruit in pure Col and Col/Ler F1 hybrids, respectively. (C, D) Average number of viable and non-viable pollen grains per anther, following alexander staining. n indicates for the number of plants analyzed. For each plant, the number of seeds has been counted in a minimum of 10 fruits, and the number of pollen grains in a minimum of three anthers. Error bars: +/- SD. Tests compare each genotype with the wild type, and are done by Anova followed by Dunnet correction for multiple tests.

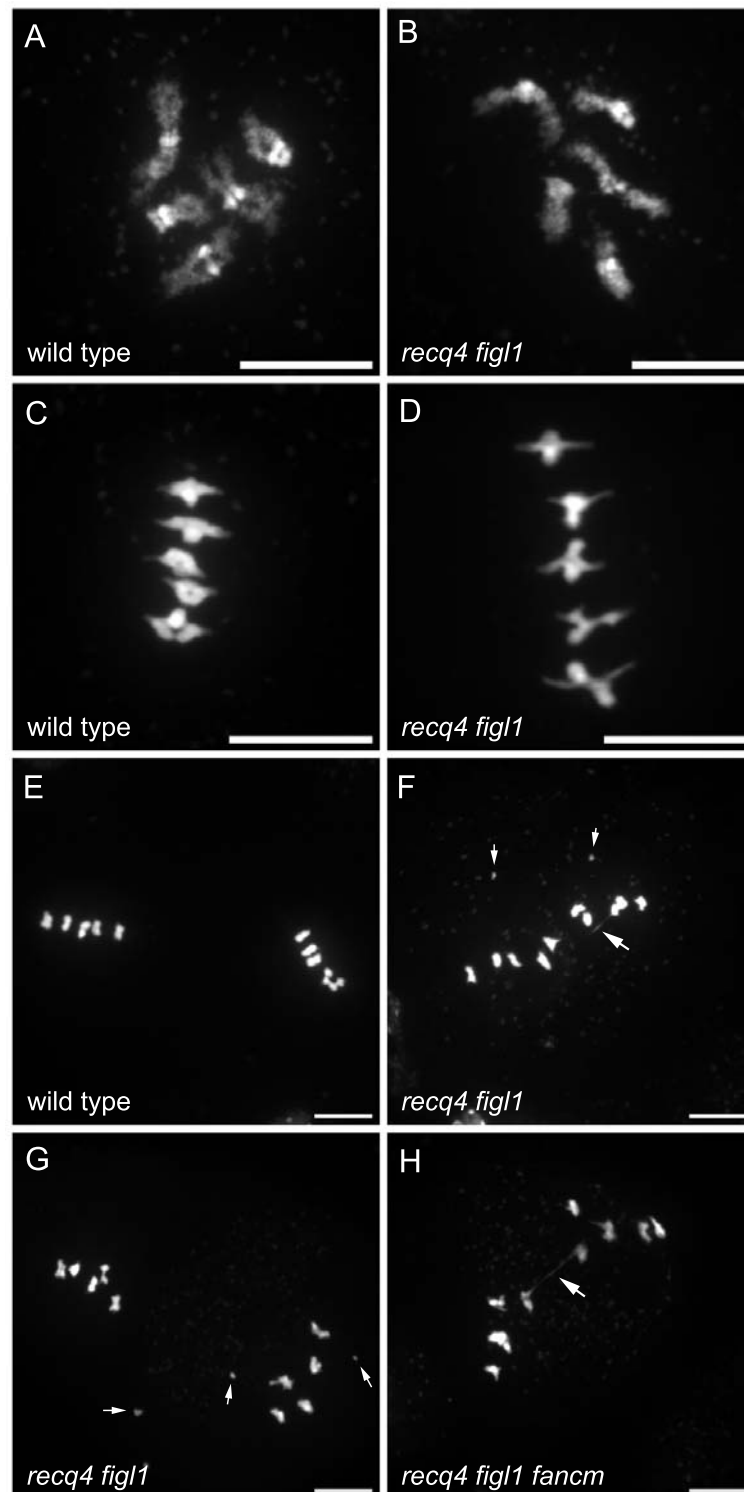

Figure 5. Meiotic chromosome spreads.

(A, B) Diakinesis. Five chromosome pairs are observed in both wild type (Col) and *recq4 figl1* and appear to be more tightly linked in *recq4 figl1*. (C,D) Metaphase I. The five chromosome pairs are aligned on the metaphase plate. (E-H) Metaphase II. In wild type, five pairs of chromatids align on two metaphase plates. In *recq4 figl1* and *recq4 figl1 fancm*, chromatid bridges (large arrows) and chromosome fragments (small arrows) are observed in 50% of the cells. Scale bars=10 $\mu$ M.



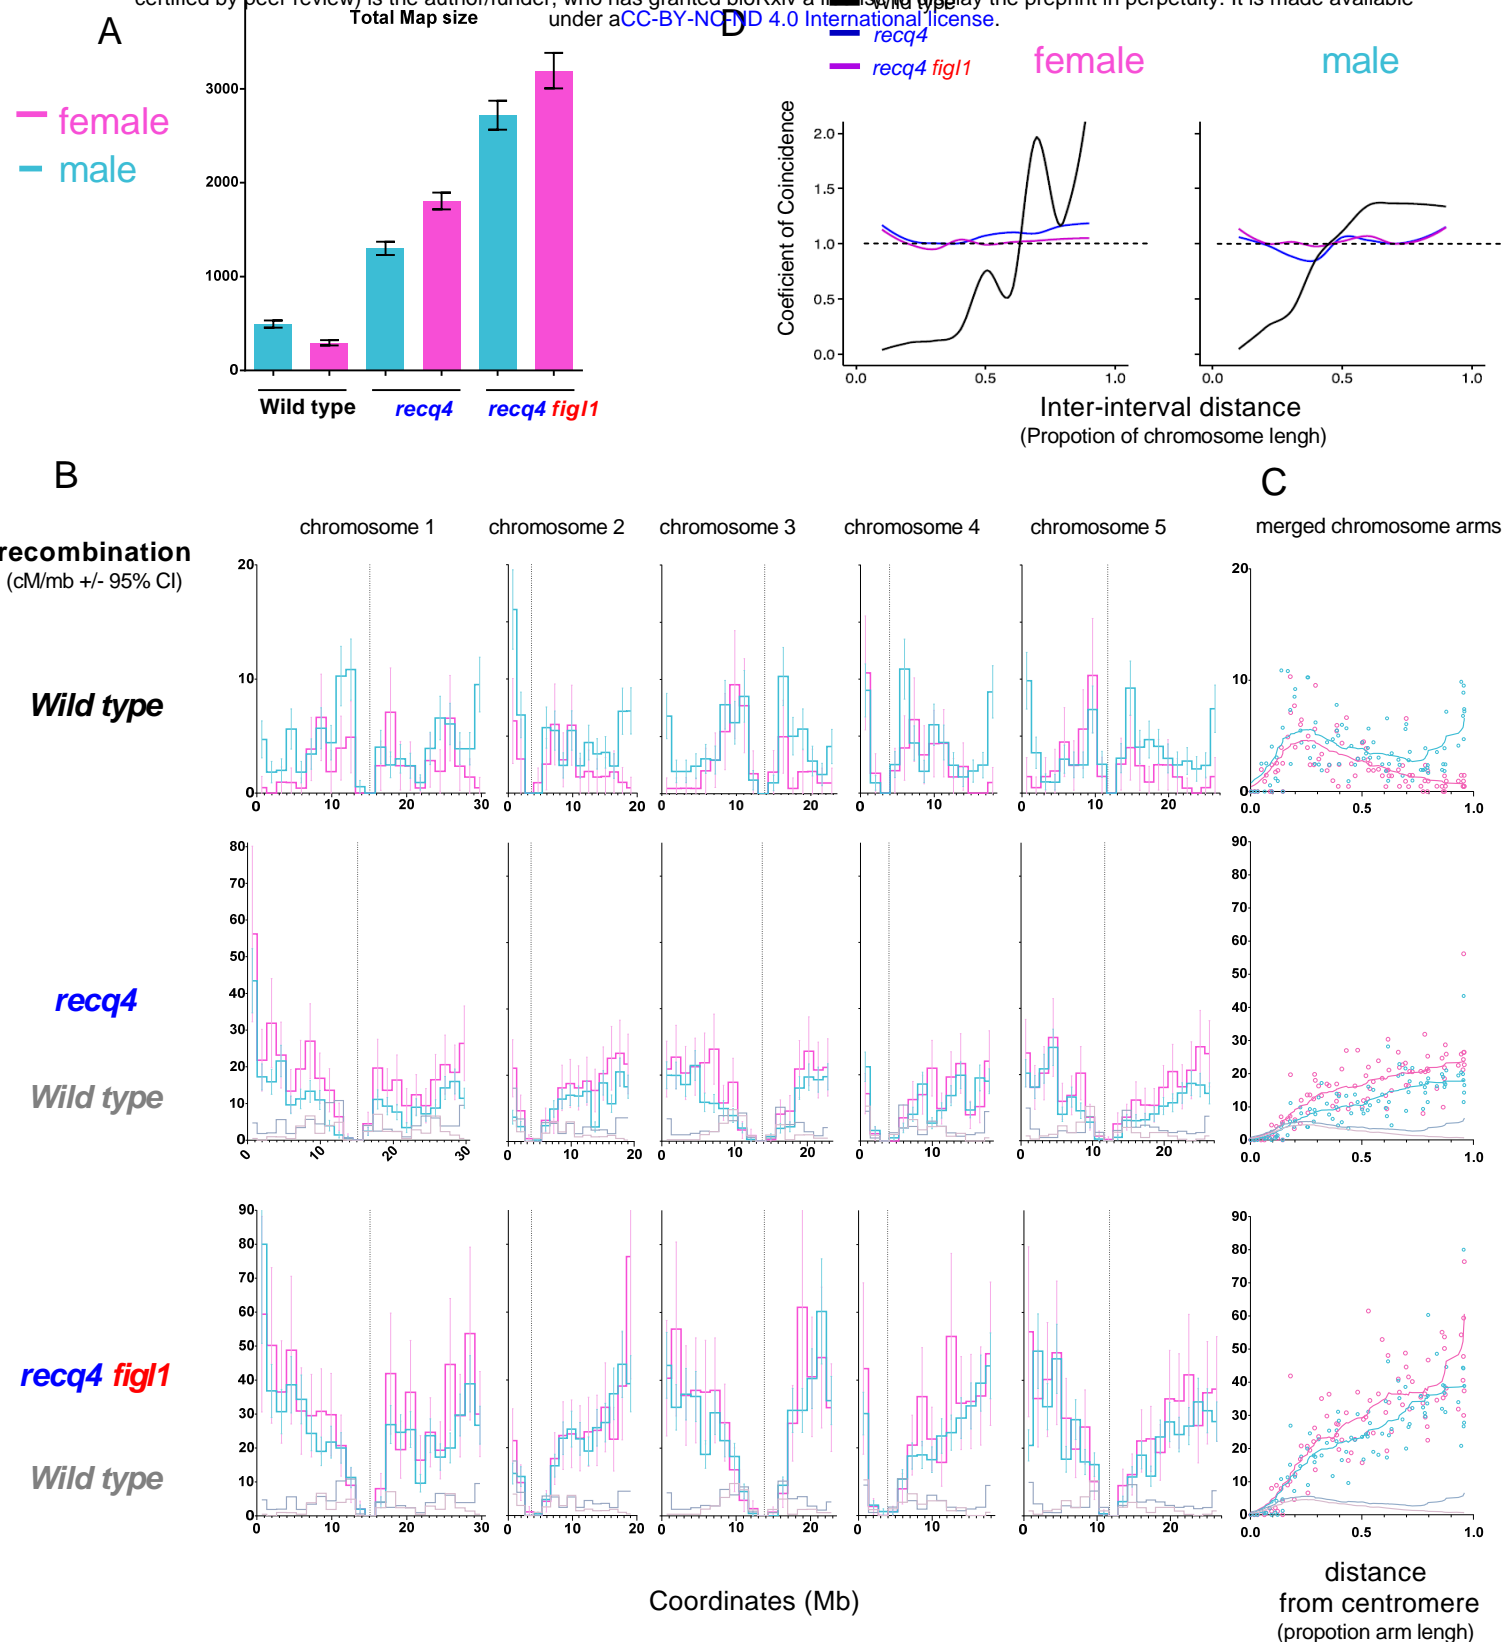

Source: http://biorxiv.org/content/10.1101/159640v1.full.pdf
